# Supplementary material
Source: PubMed Central journal article supplement (PMC4496462)
Supplement: NIHMS63677-supplement-01.pdf [file NIHMS63677-supplement-01.pdf]

## SUPPLEMENTARY MATERIALS

### Appendix S1. Description of the intervention

**Table S1. Description of the workshops**

| Stages                                                     | Objective                                                                                 | Tool                              | Time   | Description                                                                                                                                                                                                                                                                                                                                                                                                                                                                                                                     |
|------------------------------------------------------------|-------------------------------------------------------------------------------------------|-----------------------------------|--------|---------------------------------------------------------------------------------------------------------------------------------------------------------------------------------------------------------------------------------------------------------------------------------------------------------------------------------------------------------------------------------------------------------------------------------------------------------------------------------------------------------------------------------|
| (i) Introduction                                           | To break the ice and facilitate participation                                             | Puzzle-solving                    | 15 min | Each participant is given a piece of a jigsaw puzzle and directed to find other participants with pieces belonging to the same puzzle (out of a total of 6 puzzles). When complete, each puzzle produces a picture of the following: rainfall, sunshine, wind, river, tree and agricultural field. The participants then have to comment on the importance of these elements for their daily livelihoods.                                                                                                                       |
| (ii) Definition of key concepts                            | To define the concept of <i>climate</i> and introduce the notion of <i>climate change</i> | Brainstorming                     | 20 min | The audience is asked to define the concept of <i>climate</i> . All the ideas discussed are recorded on a flip chart. Once enough topics have been discussed to enable the concept to be defined, the notion of <i>climate change</i> is introduced in relation to the topics shown on the flip chart.                                                                                                                                                                                                                          |
| (iii) Technical information on the topic of climate change | To present up-to-date information on climate change as framed by the media                | Exposition                        | 40 min | The scientific notion of climate change is introduced to the audience by showing a sequence of 20 pictures and graphs obtained from the mass media (e.g. Gore 2009). After providing some insights into the notion of global warming as an anthropogenic phenomenon, the audience is presented with information on the climatic changes reported in Bolivian Amazonia (specifically: decreased rainfall, increased temperatures, increased flood frequency, increased cold season duration and increased cold season strength). |
|                                                            |                                                                                           | Game about past-present scenarios | 20 min | Each participant is given a picture of a landscape and told to find another participant with a counterpart of the same picture (e.g. flooded vs non-flooded river; humid vs dry forest). Once the connected pairs of pictures are found, the audience is asked to discern between past and present image, and a possible link with climate change.                                                                                                                                                                              |
|                                                            |                                                                                           | Brainstorming                     | 20 min | In order to summarize the contents of the presentation, the audience is asked to brainstorm on all the things learned about the concept of <i>climate change</i> .                                                                                                                                                                                                                                                                                                                                                              |
|                                                            |                                                                                           | Questions                         | 20 min | The audience is given the opportunity to pose questions to the convener about climate change and about the workshop.                                                                                                                                                                                                                                                                                                                                                                                                            |

## Appendix S2. Validation of the method

To validate the method, we tested the random assignment of the villages (to either treatment or control groups) by running a logistic regression of each of the outcome variables against a dummy variable for the treatment, using only information from the pre-intervention survey (Table S2.1).

Because not all individuals assigned to the treatment village ended up attending the workshop, but they nonetheless undertook both surveys (post- and pre-), we analyzed data in three ways: (i) all individuals not attending the workshop (n=350), regardless of whether from treatment or control villages, were considered as the *control* group against a *treatment* (n=74) including only people who attended the workshop; (ii) all individuals in treatment villages not attending the workshop (n=167) were disregarded, and only the individuals originally assigned to the control villages (n=183) were considered as *controls*; and (iii) all individuals in the treatment villages were considered the treatment group, both those who did and did not attend the workshops (n=241). Results did not differ significantly for the three options, which suggests that there was no significant information transmission or leakage in treatment villages from the people who attended the workshop to those who did not. For this reason, only results for option (i) are presented in the paper.

Since the number of people in the control and treatment groups differed, we also tested for sampling effects. Specifically, we conducted the same analysis with a randomly selected sub-sample of people in the control group (n=96). Results of both analyses did not differ significantly (see Table S2.2).

**Table S2.1 Test for the Random assignment of treatment and controls**

| Outcome Variable     | Coefficient | Standard Error | Pseudo-R <sup>2</sup> | p-value |
|----------------------|-------------|----------------|-----------------------|---------|
| Rainfall             | 0.390       | 0.281          | 0.0038                | 0.166   |
| Temperature          | -0.362      | 0.303          | 0.0031                | 0.233   |
| Flood frequency      | 0.426       | 0.362          | 0.0043                | 0.239   |
| Cold season duration | 0.516       | 0.354          | 0.0066                | 0.145   |
| Cold season strength | 0.506       | 0.353          | 0.0062                | 0.151   |

Note: Outcome variables (previously transformed into *agreement* measures, see Section 2.6) logistically regressed against a *treatment* dummy variable, using only information from the pre-intervention survey. \* and \*\*, significant at  $\leq 0.05$  and  $\leq 0.01$ , respectively. See Table 1 for definition of variables.

**Table S2.2. Difference-in-Difference multivariate estimations: Effects of intervention on outcome variables (n=848) using other control-treatment groupings**

| Results using other control-treatment groupings                              |                                                                            |                  |                   |
|------------------------------------------------------------------------------|----------------------------------------------------------------------------|------------------|-------------------|
| Grouping (i)                                                                 | Outcome Variable                                                           | Robustness       |                   |
|                                                                              |                                                                            | [1]              | [2]               |
| n <sub>control</sub> = 350<br>n <sub>treatment</sub> = 74                    | Rainfall                                                                   | -0.185 (±0.371)  | -0.273 (±0.454)   |
|                                                                              | Temperature                                                                | 0.431 (±0.390)   | 0.523 (±0.648)    |
|                                                                              | Flood frequency                                                            | -0.691 (±0.622)  | -0.106 (±0.466)   |
|                                                                              | Cold season duration                                                       | -1.022 (±0.559)  | -1.142 (±0.501)*  |
|                                                                              | Cold season strength                                                       | -0.308 (±0.462)  | -0.353 (±0.536)   |
|                                                                              | Grouping (ii)<br>n <sub>control</sub> = 183<br>n <sub>treatment</sub> = 74 | Rainfall         | -0.232 (±0.403)   |
| Temperature                                                                  |                                                                            | 0.322 (±0.413)   | 0.411 (±0.731)    |
| Flood frequency                                                              |                                                                            | -0.353 (±0.654)  | -0.487 (±0.720)   |
| Cold season duration                                                         |                                                                            | -1.254 (±0.582)* | -1.455 (±0.514)** |
| Cold season strength                                                         |                                                                            | -0.273 (±0.494)  | -0.345 (±0.580)   |
| Grouping (iii)<br>n <sub>control</sub> = 183<br>n <sub>treatment</sub> = 241 |                                                                            | Rainfall         | -0.142 (±0.291)   |
|                                                                              | Temperature                                                                | -0.019 (±0.288)  | 0.049 (±0.544)    |
|                                                                              | Flood frequency                                                            | -0.560 (±0.497)  | -0.638 (±0.756)   |
|                                                                              | Cold season duration                                                       | -0.862 (±0.414)* | -0.967 (±0.567)   |
|                                                                              | Cold season strength                                                       | -0.056 (±0.367)  | -0.207 (±0.597)   |
|                                                                              | Results using a sub-sample of controls                                     |                  |                   |
| Grouping (iv)                                                                | Outcome Variable                                                           | Robustness       |                   |
|                                                                              |                                                                            | [1]              | [1]               |
| n <sub>control</sub> = 96<br>n <sub>treatment</sub> = 96                     | Rainfall                                                                   | -0.149 (±0.433)  | -0.263 (±0.434)   |
|                                                                              | Temperature                                                                | 0.760 (±0.447)   | 0.762 (±0.704)    |
|                                                                              | Flood frequency                                                            | 1.237 (±0.798)   | 1.395 (±0.914)    |
|                                                                              | Cold season duration                                                       | -0.553 (±0.647)  | -0.834 (±0.583)   |
|                                                                              | Cold season strength                                                       | 0.596 (±0.542)   | 0.527 (±0.364)    |

Note: Outcome variables (previously transformed into *agreement* measures, see Section 2.6) logistically regressed against *treatment* and *after* binary dummy variables, and interaction of *treatment\*after*. Coefficient reported (Standard Error in parenthesis) refers to the difference-in-difference coefficient (*treatment\*after*). *Treatment* = 1 if the person received treatment; *treatment* = 0 if the person was control. *After* = 1 if year 2009 (after intervention); *after* = 0 if year = 2008 (before intervention). [1] Raw model. Controls for [2] A full set of village dummy variables. \* and \*\*, significant at  $\leq 0.05$  and  $\leq 0.01$ , respectively. See Table 1 for definition of variables.

### Appendix S3. Descriptive comparison of changes in climatic perceptions

The bivariate analysis of the outcome variable (i.e. agreement) allows us to get a preliminary assessment of the magnitude of effect of the intervention. Table S3 shows the results of this analysis for the five weather features, both before and after the workshop and for both treatment and control groups.

**Table S3. Analysis of change in outcome variables (n=848 = 424 people\*2 surveys)**

| Outcome Variables         | Groups          |                  |                              |
|---------------------------|-----------------|------------------|------------------------------|
|                           | [1]             | [2]              | [3]                          |
|                           | Control (n=350) | Treatment (n=74) | $\Delta$ (Treatment-Control) |
| Rainfall                  |                 |                  |                              |
| Before Treatment          | 48%             | 58%              | 10%                          |
| After Treatment           | 64%             | 69%              | 5%                           |
| $\Delta$ (After – Before) | 16%             | 11%              | -5%                          |
| Temperature               |                 |                  |                              |
| Before Treatment          | 36%             | 29%              | -7%                          |
| After Treatment           | 37%             | 39%              | 2%                           |
| $\Delta$ (After – Before) | 1%              | 10%              | 9%                           |
| Flood frequency           |                 |                  |                              |
| Before Treatment          | 13%             | 19%              | 6%                           |
| After Treatment           | 5%              | 7%               | 2%                           |
| $\Delta$ (After – Before) | -8%             | -12%             | -4%                          |
| Cold season duration      |                 |                  |                              |
| Before Treatment          | 14%             | 21%              | 7%                           |
| After Treatment           | 17%             | 11%              | -6%                          |
| $\Delta$ (After – Before) | 3%              | -10%             | -13%                         |
| Cold season strength      |                 |                  |                              |
| Before Treatment          | 13%             | 21%              | 8%                           |
| After Treatment           | 20%             | 24%              | 4%                           |
| $\Delta$ (After – Before) | 7%              | 3%               | -4%                          |

Note: All the outcome variables have been transformed into binary surrogates for *agreement*, measuring if the individual perceptions reported matched the information presented in the workshop (coded as 1) or not (coded as 0). The numbers in each cell show the agreement both before and after the intervention, and in both control and treatment individuals.

## Appendix S4. Descriptive ethnoclimatological knowledge of the Tsimane’

**Table S4. Ethnoclimatological knowledge held by the Tsimane’**

| Generic use          | Indicator type | Scientific name               | Tsimane’ name              | English name              | Description <sup>1</sup>                                                                                                                                                                                                                                             |
|----------------------|----------------|-------------------------------|----------------------------|---------------------------|----------------------------------------------------------------------------------------------------------------------------------------------------------------------------------------------------------------------------------------------------------------------|
| Flood predictor      | Phytoindicator | <i>Chorisia speciosa</i>      | Vojshinaj                  | Silk Floss Tree           | Its early fructification indicates that there will be a flood.                                                                                                                                                                                                       |
| Flood predictor      | Phytoindicator | <i>Citrus sinensis</i>        | Maraca                     | Sweet Orange              | Its early ripening indicates that there will be a flood.                                                                                                                                                                                                             |
| Flood predictor      | Zoindicator    | <i>Amazilia saucerrottei</i>  | Bista', chu'chu'           | Steely-vented Hummingbird | The altitude of the flight of the bird (over the river) indicates the height of an upcoming flood. Other indigenous peoples in Bolivia are reported to predict the height of floods by looking at the behavior of birds (Claverías 2010).                            |
| Flood predictor      | Zoindicator    | <i>Atta</i> spp.              | Bicoroï'                   | Leafcutter ants           | Unusual concentrations of these ants flying in the forest indicate an upcoming flood in the short term (1-3 days).                                                                                                                                                   |
| Flood predictor      | Zoindicator    | <i>Panthera onca</i>          | Itsiqui'                   | Jaguar                    | Its deep roar by night indicates that there will be a flood the day after. There is the extended belief that the jaguar actually invokes the flood.                                                                                                                  |
| Livelihood indicator | Phytoindicator | <i>Sapium marmieri</i>        | Mujpe                      | Leche leche               | The falling of its leaves indicates a good time to start clearing the agricultural plots.                                                                                                                                                                            |
| Livelihood indicator | Phytoindicator | <i>Tetragastris altissima</i> | Na'fa                      | Isigo Tree                | Its flowering indicates that the rainy-season honey is ready to be harvested.                                                                                                                                                                                        |
| Livelihood indicator | Zoindicator    | Cicadidae spp.                | Rojo'                      | Cicadas                   | The singing of the cicadas announces the timing for opening the agricultural plots. Mosetenes from Bolivian Amazonia share this belief (Ferreira 2011). Also the Kariñas in Venezuela use the Cicadas as a bioindicator for the same purpose (Olivares et al. 2012). |
| Rainfall predictor   | Astronomical   | ---                           | Cava'vare                  | Galactic halo             | When a visible galactic halo called <i>cava'vare</i> appears around the stars, rains will arrive in the following 1-3 days. Similar halos are observed in the Andes with the Pleiades for rainfall forecasting (Orlove 2000).                                        |
| Rainfall predictor   | Astronomical   | ---                           | Sãñi                       | Moon eclipse              | In the Tsimane’ culture, a moon eclipse is perceived as a signal for an unusually dry year and poor agricultural yields. Such perception is shared with the Takana indigenous peoples from Bolivian Amazonia (Eibamaz 2010).                                         |
| Rainfall predictor   | Atmospheric    | ---                           | Japacjoi' (çhibinmayedye') | Three-day continued heat  | Three unusually hot days means that the fourth day will be rainy.                                                                                                                                                                                                    |
| Rainfall predictor   | Atmospheric    | ---                           | Pururu                     | Night thunders            | Hearing thunders by night means that the day after will be rainy.                                                                                                                                                                                                    |
| Rainfall predictor   | Phytoindicator | <i>Cecropia membranacea</i>   | Tyej                       | Pumpwood                  | When it is going to rain, the leaves of this tree turn over. Such an observation has been also reported for the Takana indigenous group from Bolivian Amazonia (Eibamaz 2010).                                                                                       |

|                    |                |                               |            |                      |                                                                                                                                                                                                                                                                                                                                                                   |
|--------------------|----------------|-------------------------------|------------|----------------------|-------------------------------------------------------------------------------------------------------------------------------------------------------------------------------------------------------------------------------------------------------------------------------------------------------------------------------------------------------------------|
| Rainfall predictor | Phytoindicator | <i>Prunus</i> spp.            | Iyason     | ---                  | Spiritual beliefs indicate that the fell of the fruits of this tree calls for big rains to come.                                                                                                                                                                                                                                                                  |
| Rainfall predictor | Zooindicator   | <i>Alouatta sara</i>          | U'ru       | Bolivian red howler  | According to spiritual beliefs, when many of them sing together, they are invoking the rain. Used to forecast rainfall in the short term (1-3 days). Such belief is shared with indigenous peoples living in Cordillera Escalera, Peru (Silva 2013).                                                                                                              |
| Rainfall predictor | Zooindicator   | <i>Rhinella marina</i>        | Abäbä      | Cane toad            | When toads are abundant in the dry season, it will be a rainy year. Such a belief is shared by many indigenous communities in the Andes (Claverías 2010).                                                                                                                                                                                                         |
| Rainfall predictor | Zooindicator   | Formicidae                    | Cahtyityij | Ants                 | When you see many holes on the ground made by ants, stormy rains will arrive in the following 1-3 days.                                                                                                                                                                                                                                                           |
| Rainfall predictor | Zooindicator   | <i>Pachycondyla</i> spp.      | Tyiquiqui' | Bulldog ants         | When many bulldog ants walk very quickly in line in the forest, it will rain by night. The same behavior is reported as a bioindicator for the same generic use by the Nasua indigenous group (Colombia), but for a different ant, namely <i>Atta cephalotes</i> (Ramos-García et al. 2011).                                                                      |
| Rainfall predictor | Zooindicator   | <i>Ramphastos toco</i>        | Yovijvi    | Toco Toucan          | When many of them sing together, it indicates that in some hours it will be rainy. Such an observation has also been reported for the Takana indigenous peoples of Bolivian Amazonia (Eibamaz 2010).                                                                                                                                                              |
| Rainfall predictor | Zooindicator   | <i>Turdus amaurochalinus</i>  | Oc'        | Creamy-billed Thrush | When this bird sings, it calls the rain.                                                                                                                                                                                                                                                                                                                          |
| Seasonal indicator | Phytoindicator | <i>Acacia loretenis</i>       | Shara'     | CariCari Tree        | Its flowering signals the onset of the rainy season.                                                                                                                                                                                                                                                                                                              |
| Seasonal indicator | Phytoindicator | <i>Bactris gasipaes</i>       | Vä'ij      | Peach Palm           | Its fructification signals the end of the rainy season and the start of the Tsimane' seasonal calendar. Many people signal that the fructification of this tree has been late in recent decades (Fernández-Llamazares et al. 2014). Changes in the phenology of <i>B. gasipaes</i> have also been reported by other Amazonian indigenous groups (Echeverri 2010). |
| Seasonal indicator | Phytoindicator | <i>Cecropia concolor</i>      | Quiruru'   | Pumpwood             | Its flowering coincides with the arrival of the first migratory fishes in the Maniqui River (Fernández-Llamazares et al. 2014).                                                                                                                                                                                                                                   |
| Seasonal indicator | Phytoindicator | Leguminosae                   | I'seji     | ---                  | When its flowering occurs, the cold season is at its middle point.                                                                                                                                                                                                                                                                                                |
| Seasonal indicator | Phytoindicator | <i>Mauritia flexuosa</i>      | Tyutyura'  | Moriche Palm         | Its flowering indicates the onset of the rainy season.                                                                                                                                                                                                                                                                                                            |
| Seasonal indicator | Phytoindicator | <i>Pourouma cecropiifolia</i> | Movai      | Amazon Tree-grape    | Its flowering indicates that the rainy-season honey is ready to be harvested.                                                                                                                                                                                                                                                                                     |
| Seasonal indicator | Phytoindicator | <i>Salacia</i> sp.            | Tiribui    | Guapomo              | Its flowering indicates the onset of the rainy season.                                                                                                                                                                                                                                                                                                            |
| Seasonal indicator | Phytoindicator | <i>Swietenia</i>              | Chura'     | Big-leaf             | Multi-indicator. Its flowering indicates the onset of the rainy                                                                                                                                                                                                                                                                                                   |

|                         |                |                               |                 |                            |                                                                                                                                                                                                                                                                   |
|-------------------------|----------------|-------------------------------|-----------------|----------------------------|-------------------------------------------------------------------------------------------------------------------------------------------------------------------------------------------------------------------------------------------------------------------|
|                         |                | <i>macrophylla</i>            |                 | Mahogany                   | season. When its seeds fly with the wind, the dry season starts.                                                                                                                                                                                                  |
| Seasonal indicator      | Phytoindicator | <i>Triplaris americana</i>    | Chij            | Ant Tree                   | Its flowering indicates the onset of the cold season.                                                                                                                                                                                                             |
| Seasonal indicator      | Zooindicator   | <i>Columba subvinacea</i>     | Oto'            | Ruddy Pigeon               | Its singing indicates the onset of the rainy season.                                                                                                                                                                                                              |
| Seasonal indicator      | Zooindicator   | <i>Glaucidium brasilianum</i> | Cayovore        | Ferruginous Pygmy Owl      | Its singing indicates the onset of the rainy season.                                                                                                                                                                                                              |
| Seasonal indicator      | Zooindicator   | Lumbricidae                   | Oya', shiri'    | Earthworms                 | When there are few worms in the agricultural plots, it means that the arrival of the migratory fishes is approaching.                                                                                                                                             |
| Seasonal indicator      | Zooindicator   | <i>Momotus momota</i>         | Ururum, uaruv   | Blue-crowned Motmot        | Its singing indicates the onset of the rainy season.                                                                                                                                                                                                              |
| Seasonal indicator      | Zooindicator   | <i>Pitangus sulphuratus</i>   | Fidiri          | Great Kiskadee             | Its singing indicates the onset of the rainy season.                                                                                                                                                                                                              |
| Storm predictor         | Phytoindicator | <i>Ceiba pentandra</i>        | O'ba            | Great Kapok Tree           | Its flowering is thought to attract big storms. Mosevenes from Bolivian Amazonia believe that this tree calls the water, because it has a puffed shape in its trunk. They also believe that when this tree does not flower, rice won't grow much (Ferreira 2011). |
| Storm predictor         | Phytoindicator | <i>Heliocarpus americanus</i> | Mü'             | Balsamillo Tree            | Its flowering indicates that there will be a big storm in the following 3 days.                                                                                                                                                                                   |
| Storm predictor         | Phytoindicator | <i>Ochroma pyramidale</i>     | Cajñere'        | Balsa Tree                 | Its flowering indicates a big storm coming.                                                                                                                                                                                                                       |
| Storm predictor         | Zooindicator   | <i>Ortalis motmot</i>         | Mara'se         | Little Chachalaca          | Its singing indicates the arrival of a big storm in the short term (1-3 days).                                                                                                                                                                                    |
| Sunny weather predictor | Astronomical   | ---                           | Dyidyista' ivaj | Smiling (U-shaped) moon    | In the rainy season, when a quarter moon looks U-shaped (i.e. smiling), the following day will be sunny. In Hawaiian astrology, this moon is called the dry moon because " <i>it holds the water</i> " (NASA 2014).                                               |
| Sunny weather predictor | Atmospheric    | ---                           | Dyicba'babdye'  | Morning fog over the river | A thick fog over the river at dawn means that the day will be sunny.                                                                                                                                                                                              |
| Sunny weather predictor | Phytoindicator | <i>Vernonia patens</i>        | O'ojvi          | Paichane                   | Its flowering indicates that the following day will be sunny.                                                                                                                                                                                                     |
| Sunny weather predictor | Zooindicator   | <i>Cerdocyon thous</i>        | Va'ajva'aj      | Crab-eating fox            | When the fox signs in the night, the following day will be sunny.                                                                                                                                                                                                 |
| Sunny weather predictor | Zooindicator   | <i>Spizaetus tyrannus</i>     | Ocoriyo         | Black Haw Eagle            | Its singing brings sunny weather. There is the extended belief of the singing of <i>Spizaetus tyrannus</i> as being a signal of good luck.                                                                                                                        |

**Note:** <sup>1</sup> See Appendix S5 in the Supplementary Materials for the complete Reference List included in this table

## Appendix S5. Additional references

Claverías R (2010) Conocimientos de los campesinos andinos sobre los predictores climáticos: elementos para su verificación. Centro de Investigación, Educación y Desarrollo del Perú. Lima, Perú.

Echeverri JA (2010) Percepciones y efectos del cambio climático en grupos indígenas de la Amazonía Colombiana. *Folia Amazónica* 19(1-2):85-93.

Eibamaz (2010) Saberes y aprendizajes del pueblo Tsimane'. Gran Consejo Tsimane', San Borja, Bolivia.

Fernández-Llamazares Á, Díaz-Reviriego I, Méndez-López ME, Sánchez IV, Pyhälä A, Reyes-García V (2014) Cambio climático y pueblos indígenas: Estudio de caso entre los Tsimane', Amazonia boliviana. *REDESMA Online Journal* 7, 110-119.

Ferreira B. (2011) Saberes locales de colonos e indígenas mosetenes sobre el cambio climático y sus efectos en los modos de vida. *Soluciones Prácticas*, La Paz, Bolivia.

NASA (2014) Why is crescent Moon sometimes lit on the bottom? Available online at: <http://starchild.gsfc.nasa.gov/docs/StarChild/questions/question43.html> [Accessed the 8th April 2014]

Olivares B, Sindoni Vielma M, Valderrama J, Aray JC (2012) Valorization of local and ancestral knowledge by the perception of climate in indigenous farming communities of southern Anzoátegui. *Revista Científica UDO Agrícola* 12(2): 407-417.

Orlove BS, Chiang JH, Cane MA (2000) Forecasting Andean rainfall and crop yield from the influence of El Niño on Pleiades visibility. *Nature* 403(6765):68-71.

Ramos-García C, Tenorio AD, Muñoz F (2011) Ciclos naturales, ciclos culturales: percepción y conocimientos tradicionales de los nasas frente al cambio climático en Toribío, Cauca, Colombia. In A Ulloa (Ed) *Perspectivas culturales del clima*. Bogotá: Universidad Nacional de Colombia.

Silva W (2013) La recuperación y el uso de los saberes locales sobre el cambio climático en el ARC Cordillera Escalera en San Martín. Deutsche Gesellschaft für Internationale Zusammenarbeit, Loreto, Perú.
